# Supplementary material for: Digital pathology-based artificial intelligence models for differential diagnosis and prognosis of sporadic odontogenic keratocysts
Source: Springer Nature journal article supplement (doi:10.1038/s41368-024-00287-y), 2024-02-26
Supplement: MOESM1 [file 41368_2024_287_MOESM1_ESM.pdf]

**A**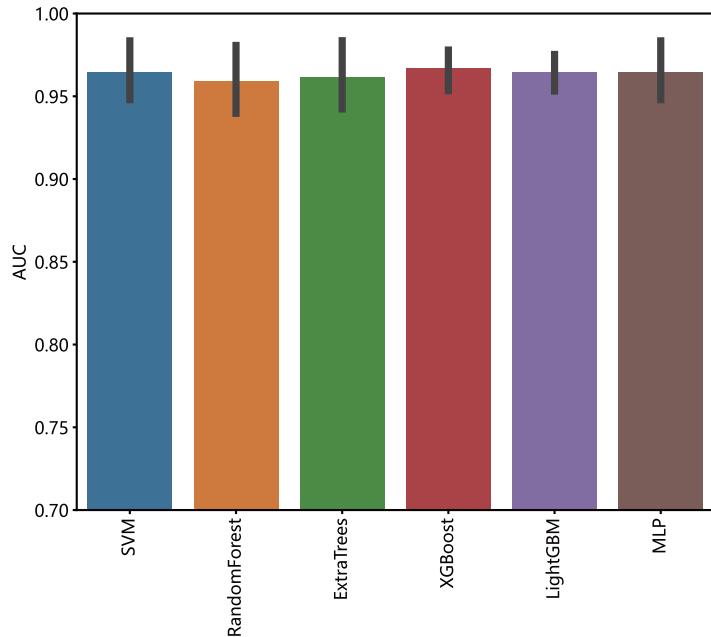**B**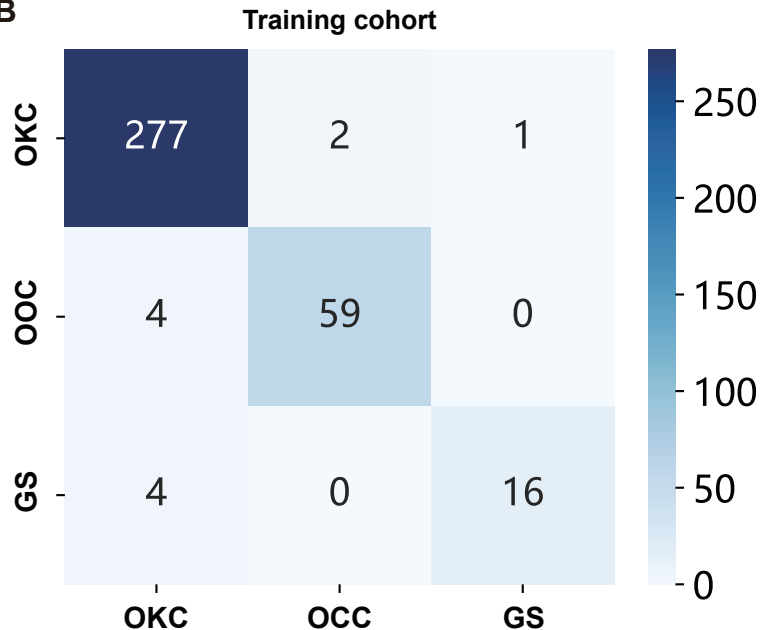

**Supplementary Figure 1.** (A) The cross-validation on the training dataset indicated good performances for all models. (B) The confusion matrices for the training datasets to visually interpret the model classification performance.
